# Supplementary material for: Cysteine oxidation triggers amyloid fibril formation of the tumor suppressor p16INK4A
Source: PubMed Central journal article supplement — Redox Biol. 2019 Sep 3;28:101316. doi: 10.1016/j.redox.2019.101316 (PMC6812003; doi:10.1016/j.redox.2019.101316), 2019-09-03
Supplement: mmc3.pdf [file mmc3.pdf]

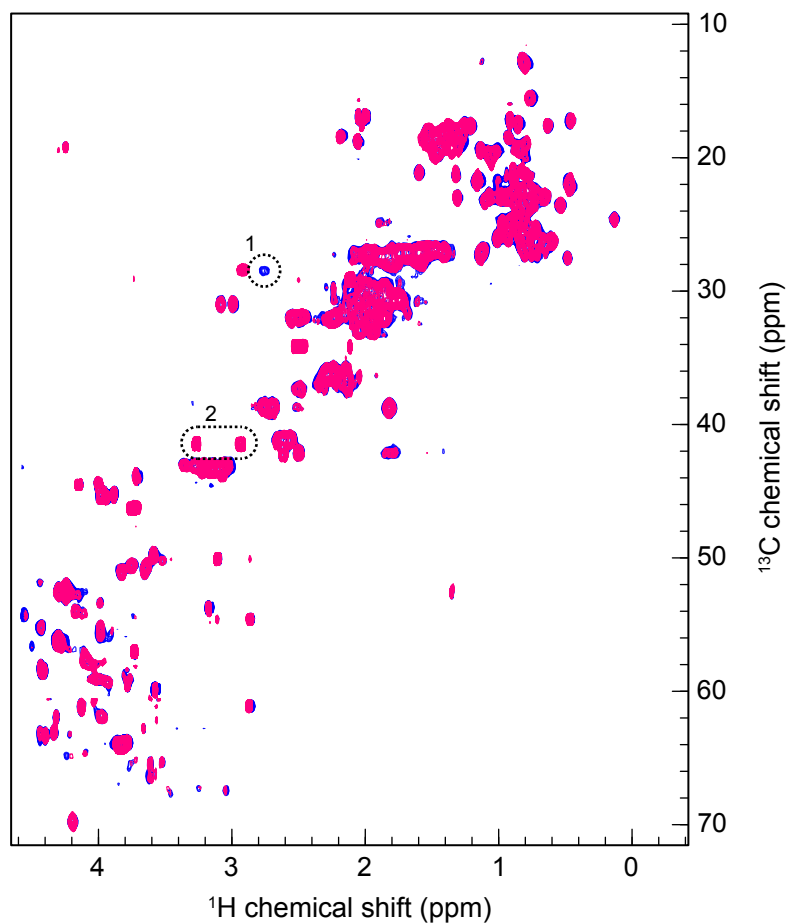

**Figure S3. Overlap of  $^1\text{H}/^{13}\text{C}$  HSQC spectra in the reduced (blue) and glutathionylated state (magenta)**  
The blue peak labeled as (1) is the reduced C72 C $\beta$  resonance. After titration with glutathione to the end point, the resonance disappears and the oxidized C $\beta$  resonance appears at the position labeled as (2).
