# Supplementary material for: Cysteine oxidation triggers amyloid fibril formation of the tumor suppressor p16INK4A
Source: PubMed Central journal article supplement — Redox Biol. 2019 Sep 3;28:101316. doi: 10.1016/j.redox.2019.101316 (PMC6812003; doi:10.1016/j.redox.2019.101316), 2019-09-03
Supplement: mmc4.pdf [file mmc4.pdf]

A

Intact Protein Masses

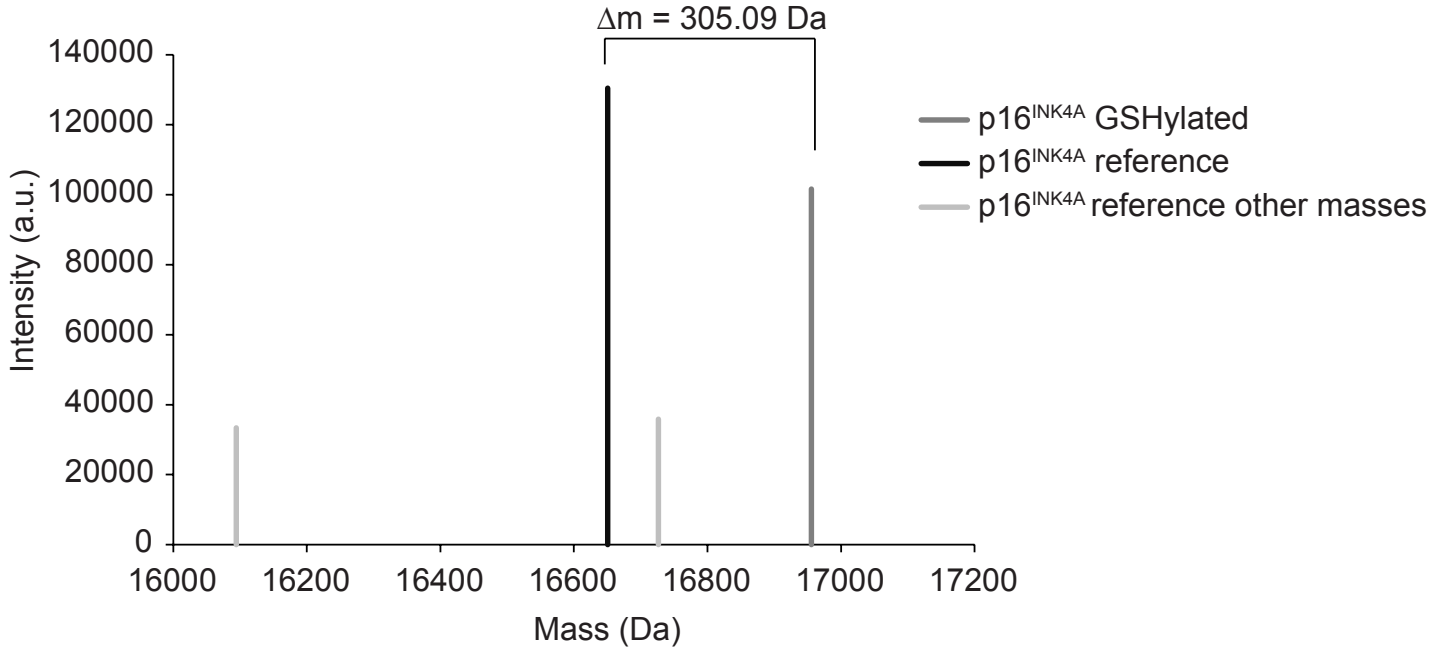

B

p16<sup>INK4A</sup> reference

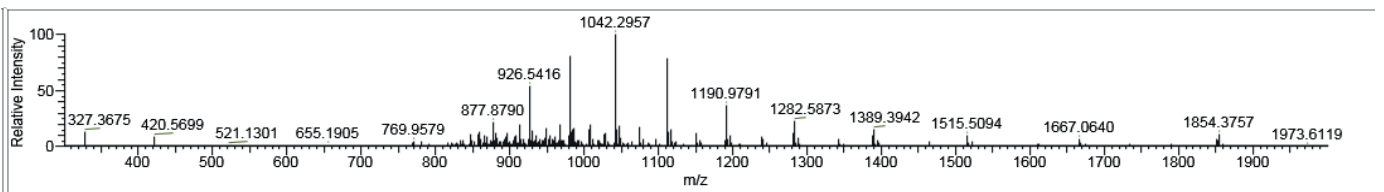

p16<sup>INK4A</sup> GSHylated

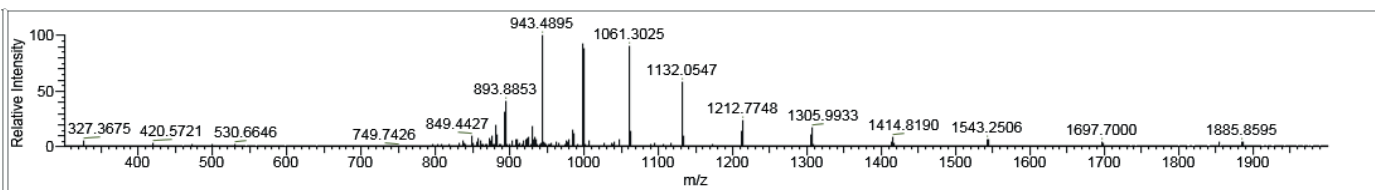

**Figure S4. Mass spectrometry analysis of reduced and glutathionylated p16<sup>INK4A</sup>.**

(A) Deconvoluted mass spectra of p16<sup>INK4A</sup> treated with GSSG shows a mass-shift of 305 Da which is in agreement with the modification of p16<sup>INK4A</sup> Cys72 with disulfide-linked Glutathione (i.e. S-GSHylated p16<sup>INK4A</sup>).

(B) m/z spectra of the LC-MS analysis of recombinant p16<sup>INK4A</sup> before and after S-GSHylation. The mass-spectrometric analysis to determine whether p16<sup>INK4A</sup> was indeed S-GSHylated upon GSSG treatment was performed once.
