# Supplementary material for: Cysteine oxidation triggers amyloid fibril formation of the tumor suppressor p16INK4A
Source: PubMed Central journal article supplement — Redox Biol. 2019 Sep 3;28:101316. doi: 10.1016/j.redox.2019.101316 (PMC6812003; doi:10.1016/j.redox.2019.101316), 2019-09-03
Supplement: mmc5.pdf [file mmc5.pdf]

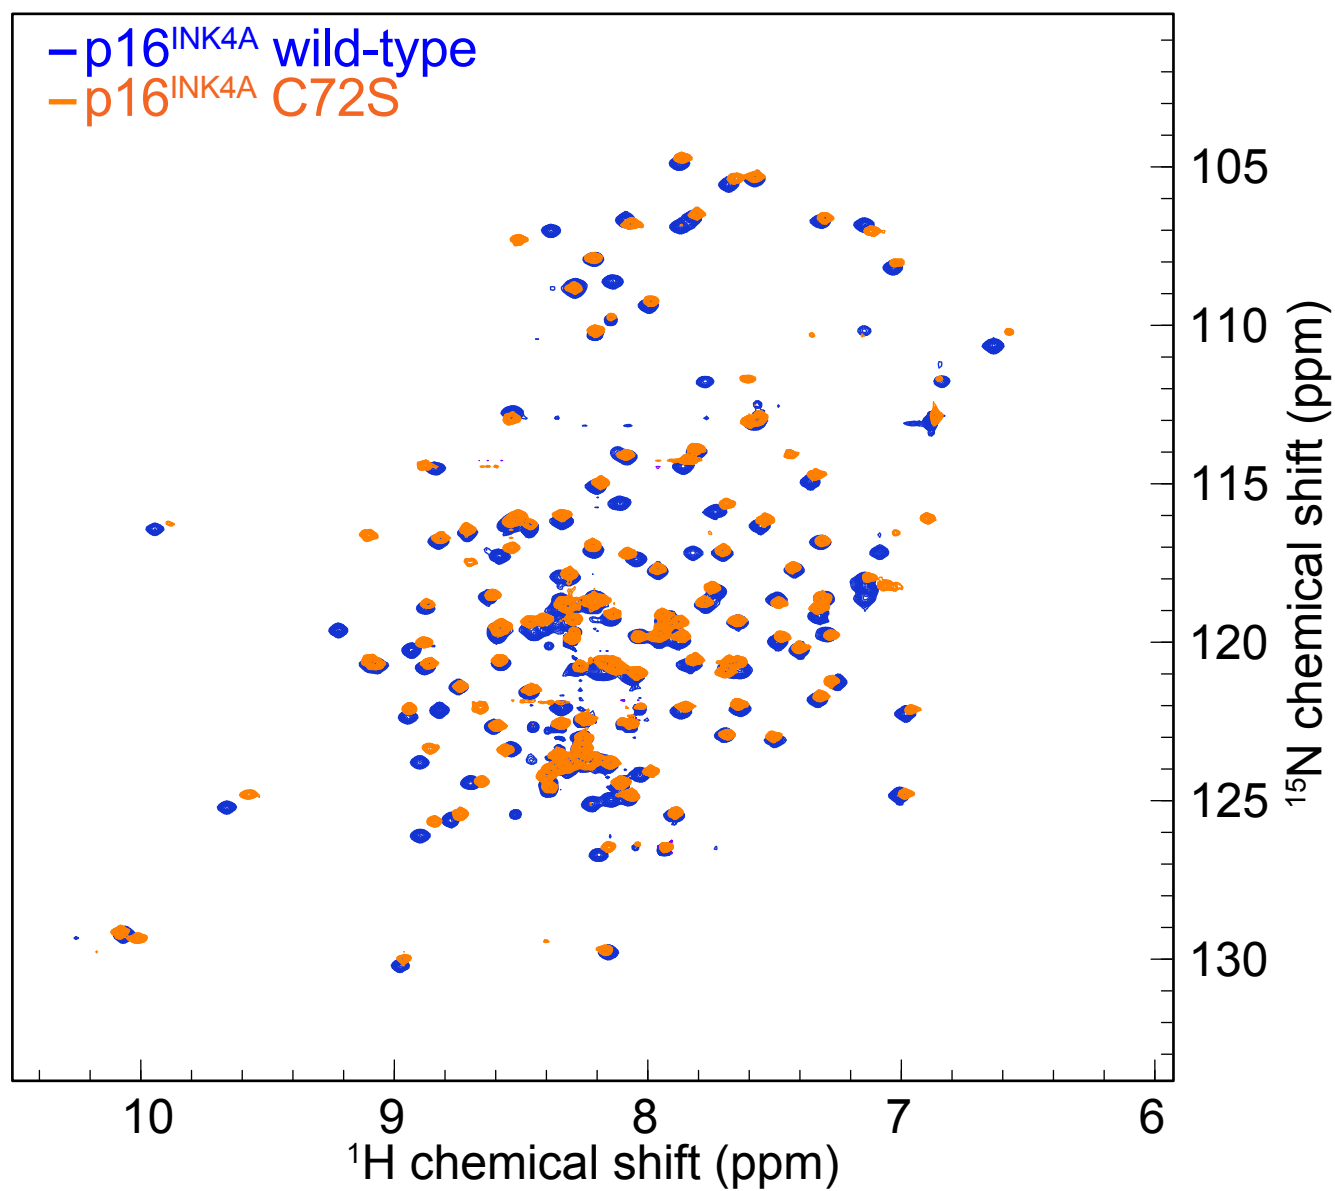

Figure S5.  $^1\text{H}^{15}\text{N}$  HSQC solution NMR spectra of WT p16<sup>INK4A</sup> (blue) and p16<sup>INK4A</sup> C72S (orange).
