# Supplementary material for: Cysteine oxidation triggers amyloid fibril formation of the tumor suppressor p16INK4A
Source: PubMed Central journal article supplement — Redox Biol. 2019 Sep 3;28:101316. doi: 10.1016/j.redox.2019.101316 (PMC6812003; doi:10.1016/j.redox.2019.101316), 2019-09-03
Supplement: mmc6.pdf [file mmc6.pdf]

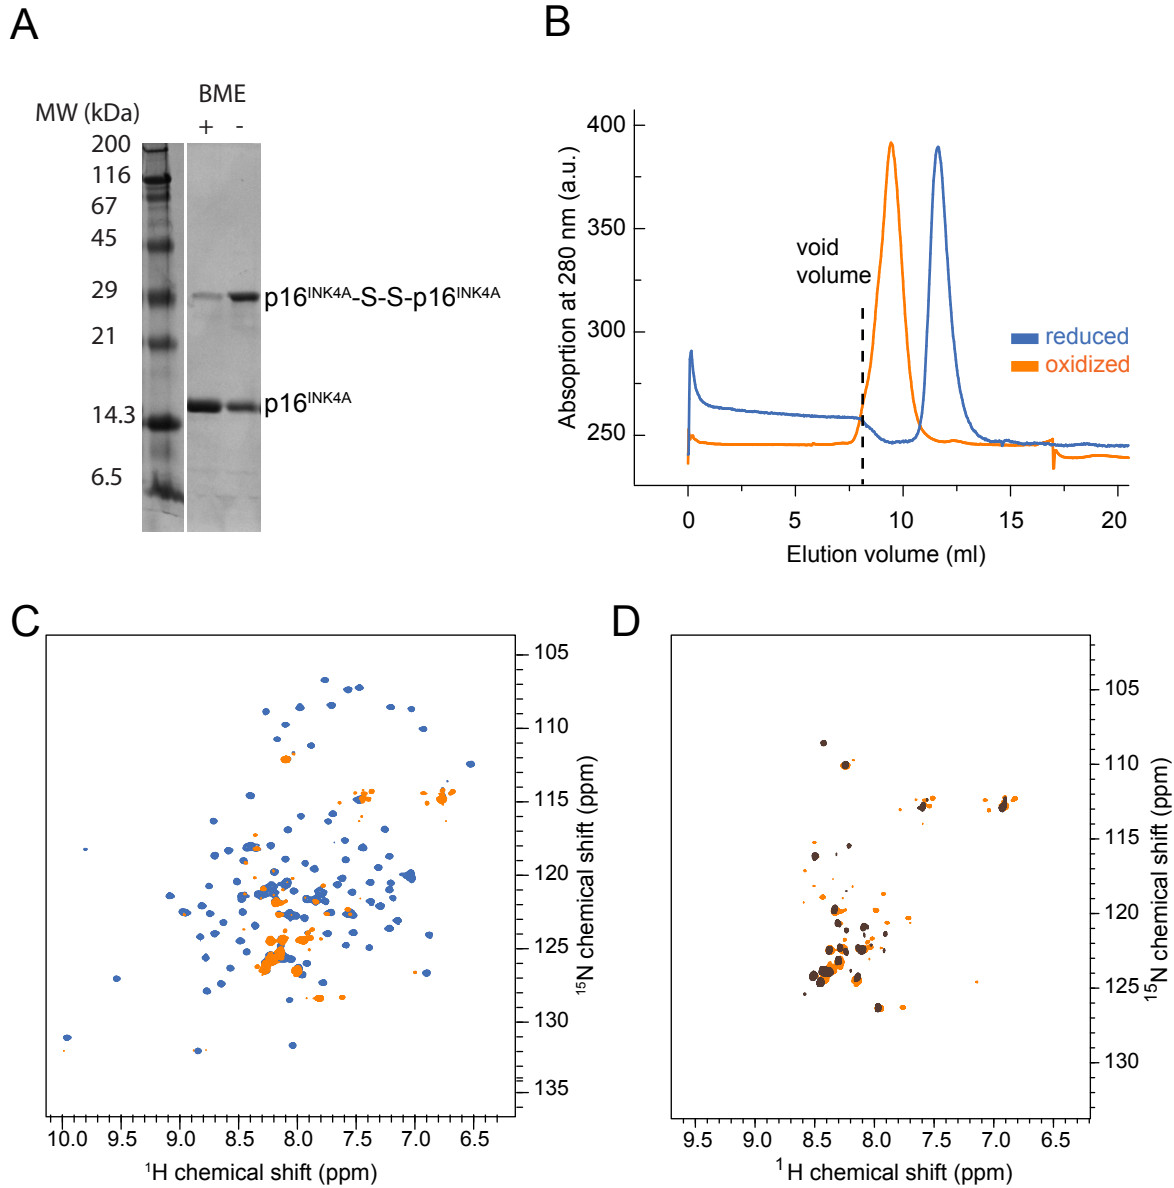

**Figure S6. Analysis of oxidized p16<sup>INK4A</sup>**

**(A)** SDS-PAGE of wild-type p16<sup>INK4A</sup> after hydrogen peroxide oxidation in the presence (left) and absence of the reducing agent BME in the sample buffer. A typical result is shown of at least 10 replicate experiments.

**(B)** Size exclusion chromatography of WT p16<sup>INK4A</sup> before (blue) and after (orange) overnight oxidation with 50 mM hydrogen peroxide at room temperature. A typical result is shown of two replicate experiments.

**(C)** Overlap of <sup>1</sup>H<sup>15</sup>N HSQC solution spectra of reduced WT p16<sup>INK4A</sup> and after addition of diamide (orange). A typical result is shown of five replicate experiments.

**(D)** Overlap of <sup>1</sup>H<sup>15</sup>N HSQC solution spectra of WT p16<sup>INK4A</sup> oxidized with H<sub>2</sub>O<sub>2</sub> (brown) and diamide (orange).
