# Supplementary material for: Cysteine oxidation triggers amyloid fibril formation of the tumor suppressor p16INK4A
Source: PubMed Central journal article supplement — Redox Biol. 2019 Sep 3;28:101316. doi: 10.1016/j.redox.2019.101316 (PMC6812003; doi:10.1016/j.redox.2019.101316), 2019-09-03
Supplement: mmc7.pdf [file mmc7.pdf]

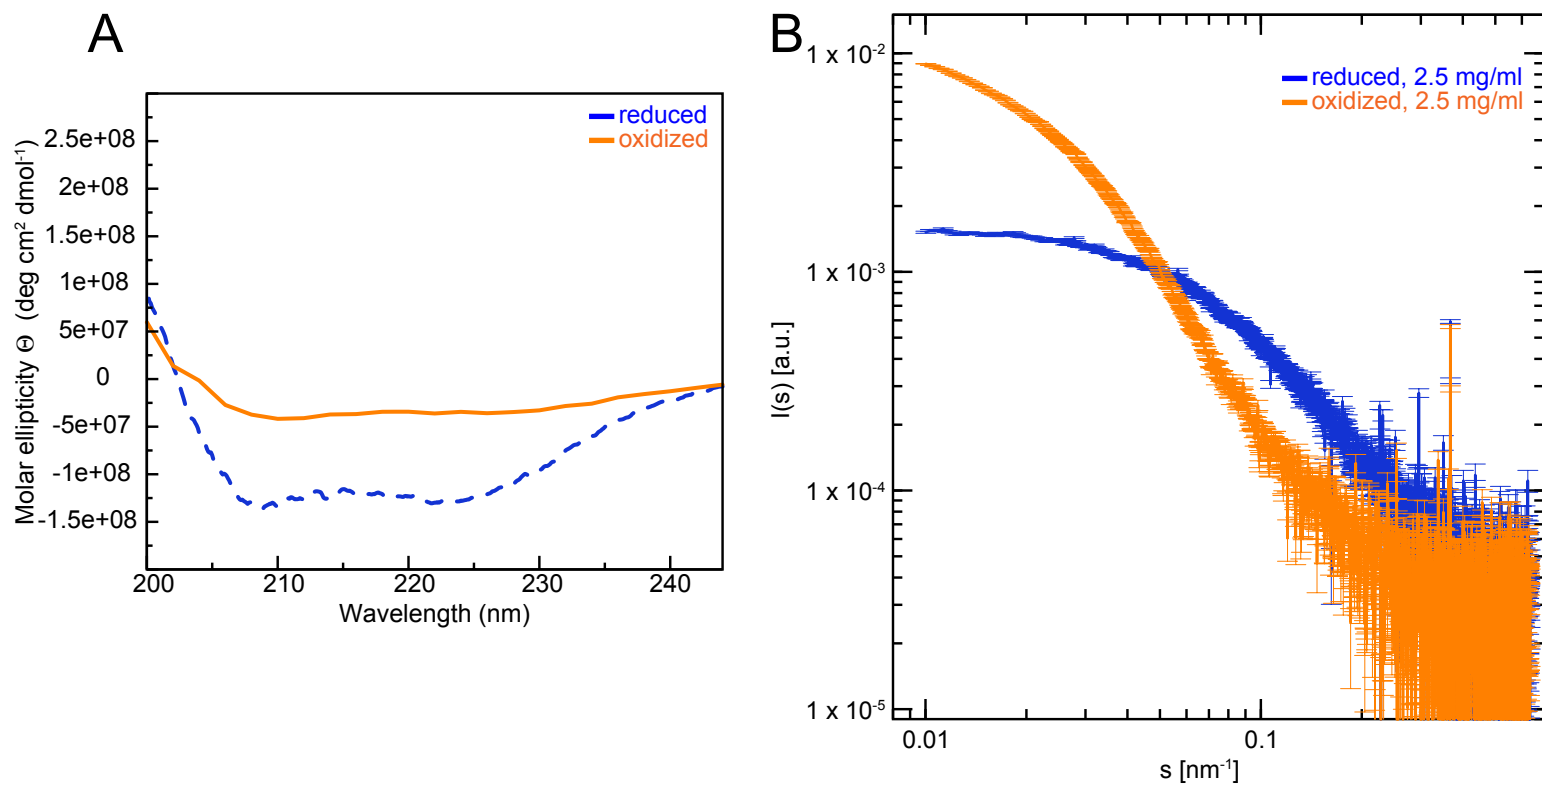

**Figure S7. CD spectroscopy and SAXS curves of reduced and oxidized p16<sup>INK4A</sup> samples**

**(A)** CD spectra of reduced (blue) and oxidized (orange) p16<sup>INK4A</sup>.

**(B)** Scattering curves of reduced (blue) and oxidized (orange) p16<sup>INK4A</sup>. Curves recorded using 2.5 mg/ml protein are presented. The oxidized sample displays typical characteristics of an aggregated protein state and could not be desmeared for detailed data analysis. The experiments were performed three times with varying concentrations showing the same trend and a single representative is shown.
