# Supplementary material for: Cysteine oxidation triggers amyloid fibril formation of the tumor suppressor p16INK4A
Source: PubMed Central journal article supplement — Redox Biol. 2019 Sep 3;28:101316. doi: 10.1016/j.redox.2019.101316 (PMC6812003; doi:10.1016/j.redox.2019.101316), 2019-09-03
Supplement: mmc8.pdf [file mmc8.pdf]

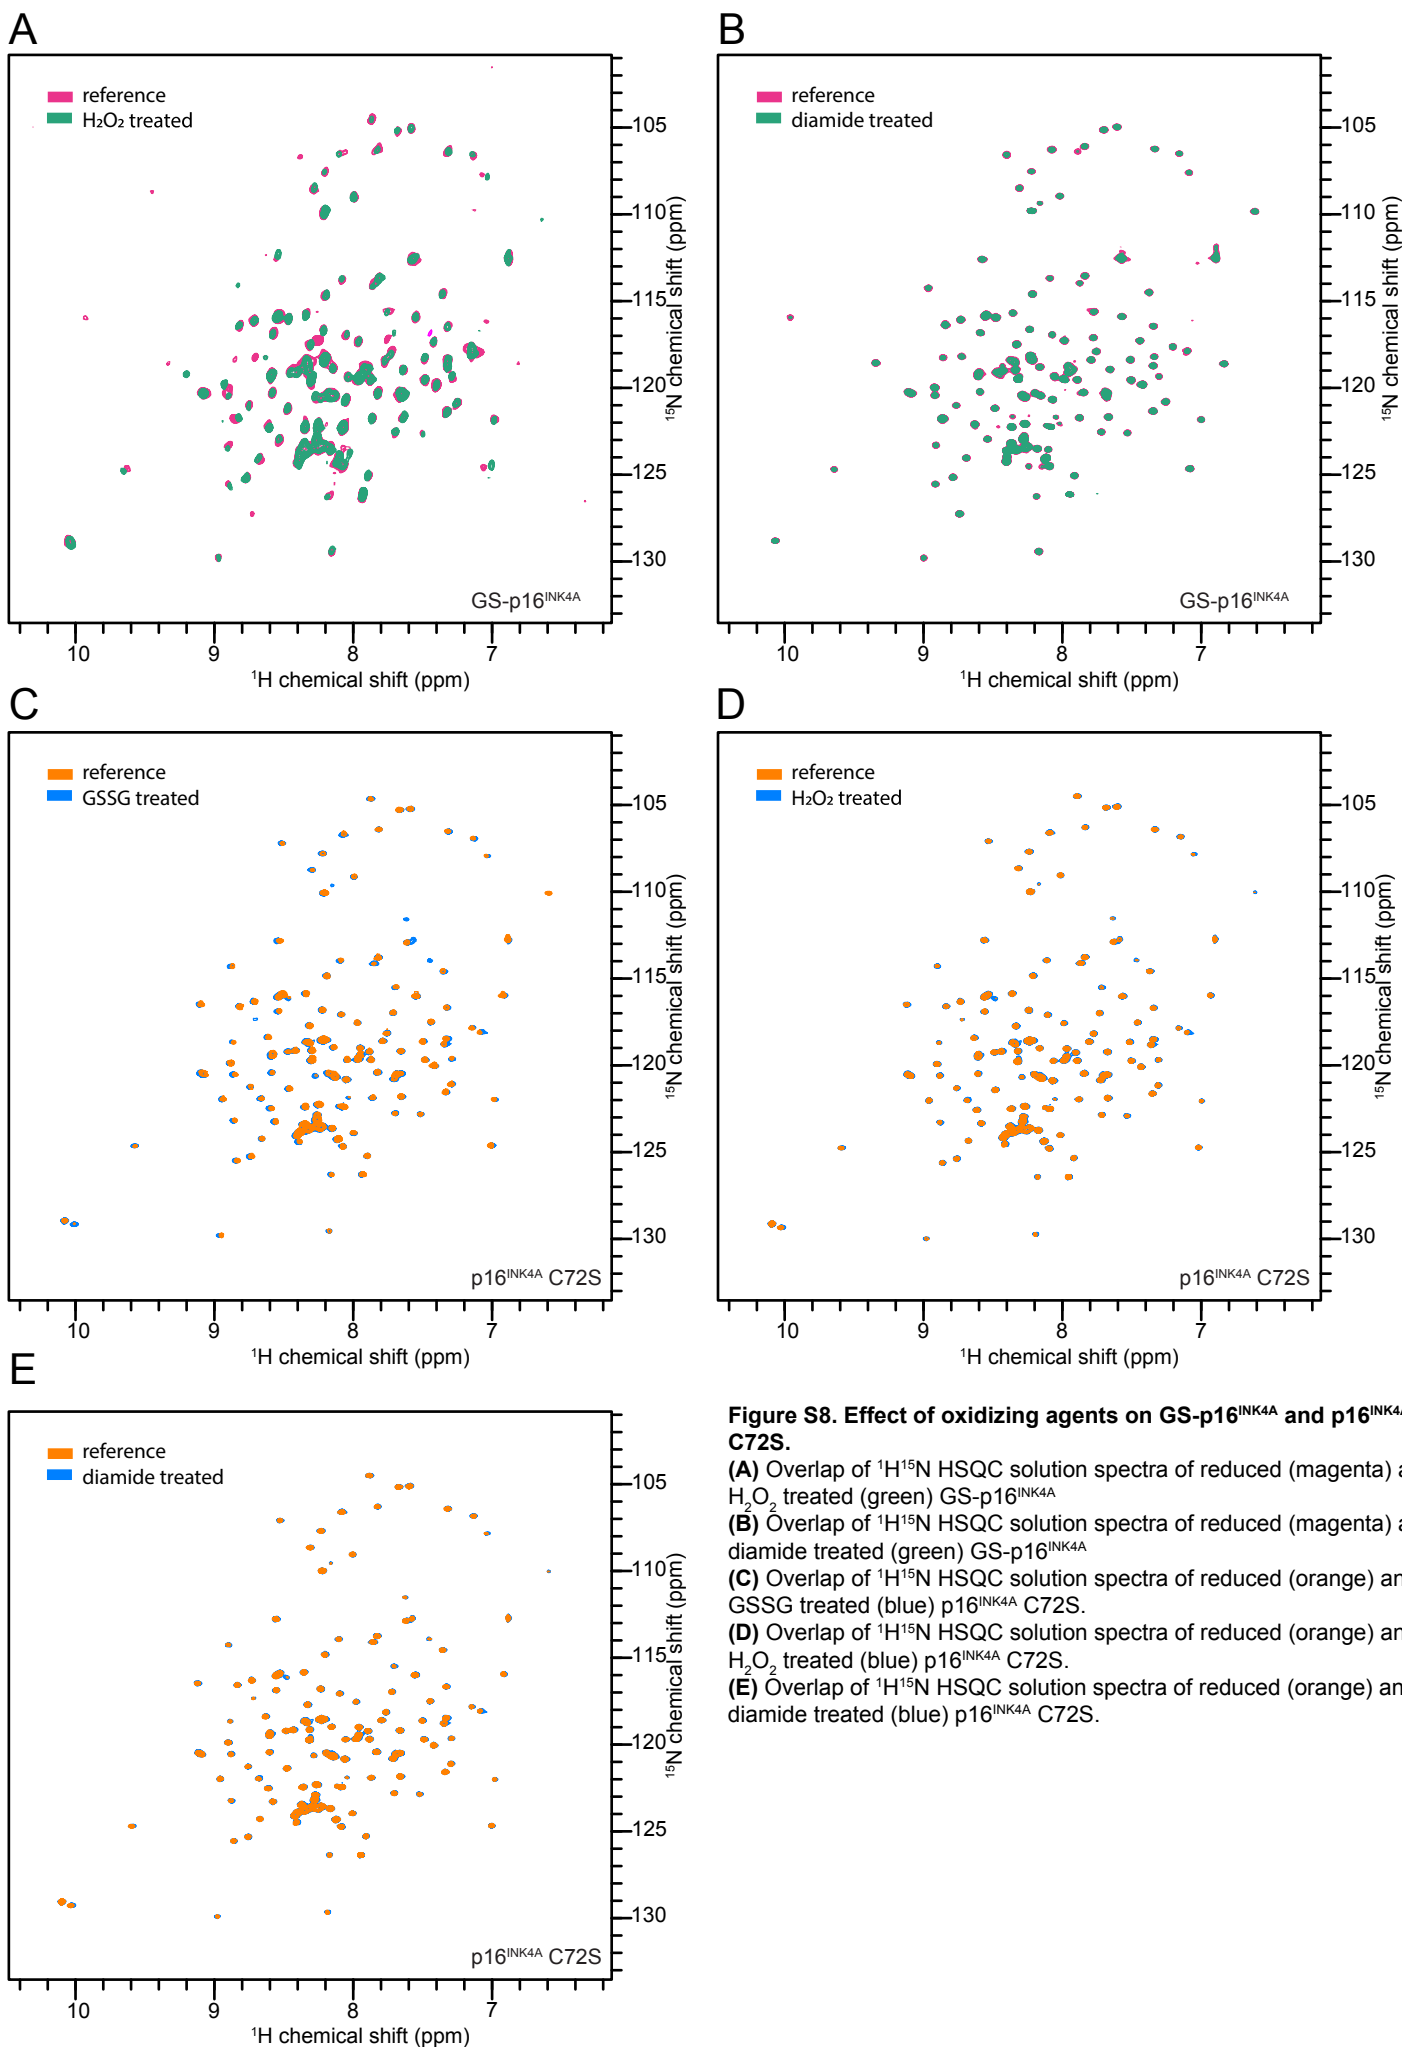

**Figure S8. Effect of oxidizing agents on GS-p16<sup>INK4A</sup> and p16<sup>INK4A</sup> C72S.**

**(A)** Overlap of <sup>1</sup>H<sup>15</sup>N HSQC solution spectra of reduced (magenta) and H<sub>2</sub>O<sub>2</sub> treated (green) GS-p16<sup>INK4A</sup>

**(B)** Overlap of <sup>1</sup>H<sup>15</sup>N HSQC solution spectra of reduced (magenta) and diamide treated (green) GS-p16<sup>INK4A</sup>

**(C)** Overlap of <sup>1</sup>H<sup>15</sup>N HSQC solution spectra of reduced (orange) and GSSG treated (blue) p16<sup>INK4A</sup> C72S.

**(D)** Overlap of <sup>1</sup>H<sup>15</sup>N HSQC solution spectra of reduced (orange) and H<sub>2</sub>O<sub>2</sub> treated (blue) p16<sup>INK4A</sup> C72S.

**(E)** Overlap of <sup>1</sup>H<sup>15</sup>N HSQC solution spectra of reduced (orange) and diamide treated (blue) p16<sup>INK4A</sup> C72S.
