# Supplementary material for: Cysteine oxidation triggers amyloid fibril formation of the tumor suppressor p16INK4A
Source: PubMed Central journal article supplement — Redox Biol. 2019 Sep 3;28:101316. doi: 10.1016/j.redox.2019.101316 (PMC6812003; doi:10.1016/j.redox.2019.101316), 2019-09-03
Supplement: mmc9.pdf [file mmc9.pdf]

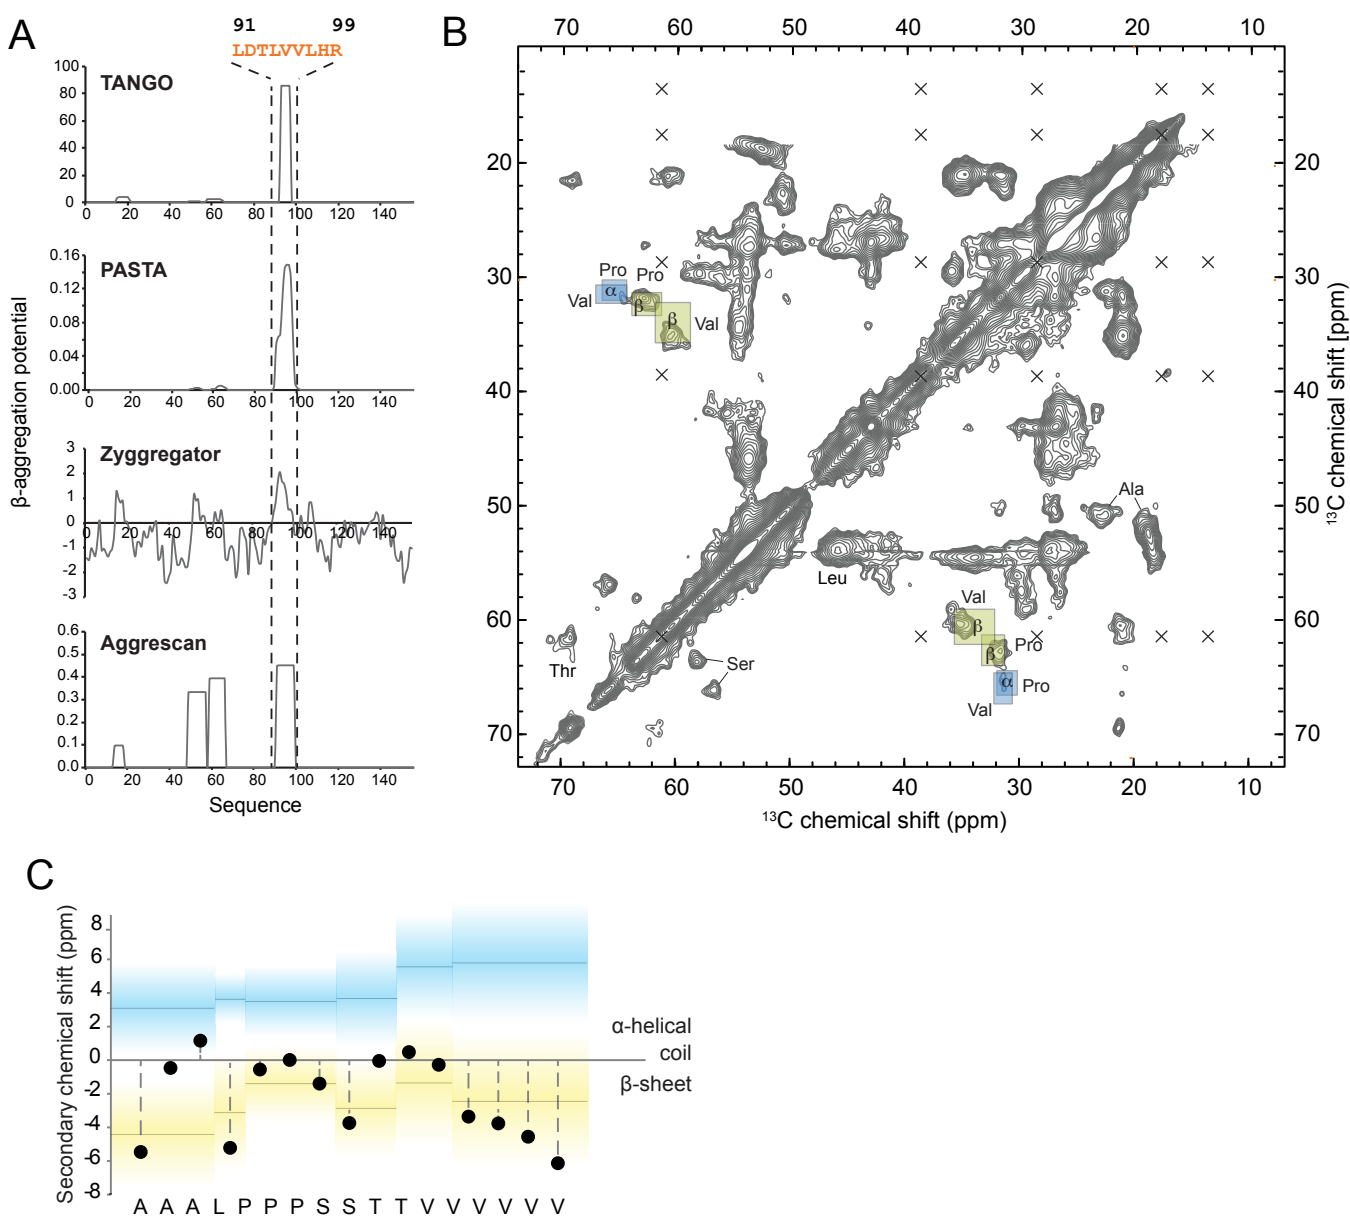

**Figure S9. Prediction of p16<sup>INK4A</sup> aggregation-prone regions**

**(A)** Four  $\beta$ -aggregation prediction algorithms predict that residues 90 to 99 of p16<sup>INK4A</sup> have high aggregation propensity.

**(B)**  $^{13}\text{C}/^{13}\text{C}$  solid state NMR spectrum of p16<sup>INK4A</sup> fibrils showing the full aliphatic region. Crosses mark positions where peaks would be expected to arise from isoleucine residues. There are three isoleucines in the full p16<sup>INK4A</sup> sequence, suggesting that these residues are absent from the folded  $\beta$ -sheet core of p16<sup>INK4A</sup> fibrils. Peaks that correspond to amino acid types with distinct shifts are labelled. Boxes indicate the average shift expected for both secondary-structure types of proline and valine, within one standard deviation.

**(C)**  $^{13}\text{C}$  Secondary chemical shifts of uniquely assigned amino acid types showing the presence of  $\beta$ -sheet secondary structural elements. Horizontal lines indicate average values for secondary chemical shifts of alpha-helix (blue) and  $\beta$ -sheet (yellow), and regions are shaded to one standard deviation.
