# Supplementary material for: Cysteine oxidation triggers amyloid fibril formation of the tumor suppressor p16INK4A
Source: PubMed Central journal article supplement — Redox Biol. 2019 Sep 3;28:101316. doi: 10.1016/j.redox.2019.101316 (PMC6812003; doi:10.1016/j.redox.2019.101316), 2019-09-03
Supplement: mmc10.pdf [file mmc10.pdf]

# Göbl, Morris & Van Dam et al. Fig S10

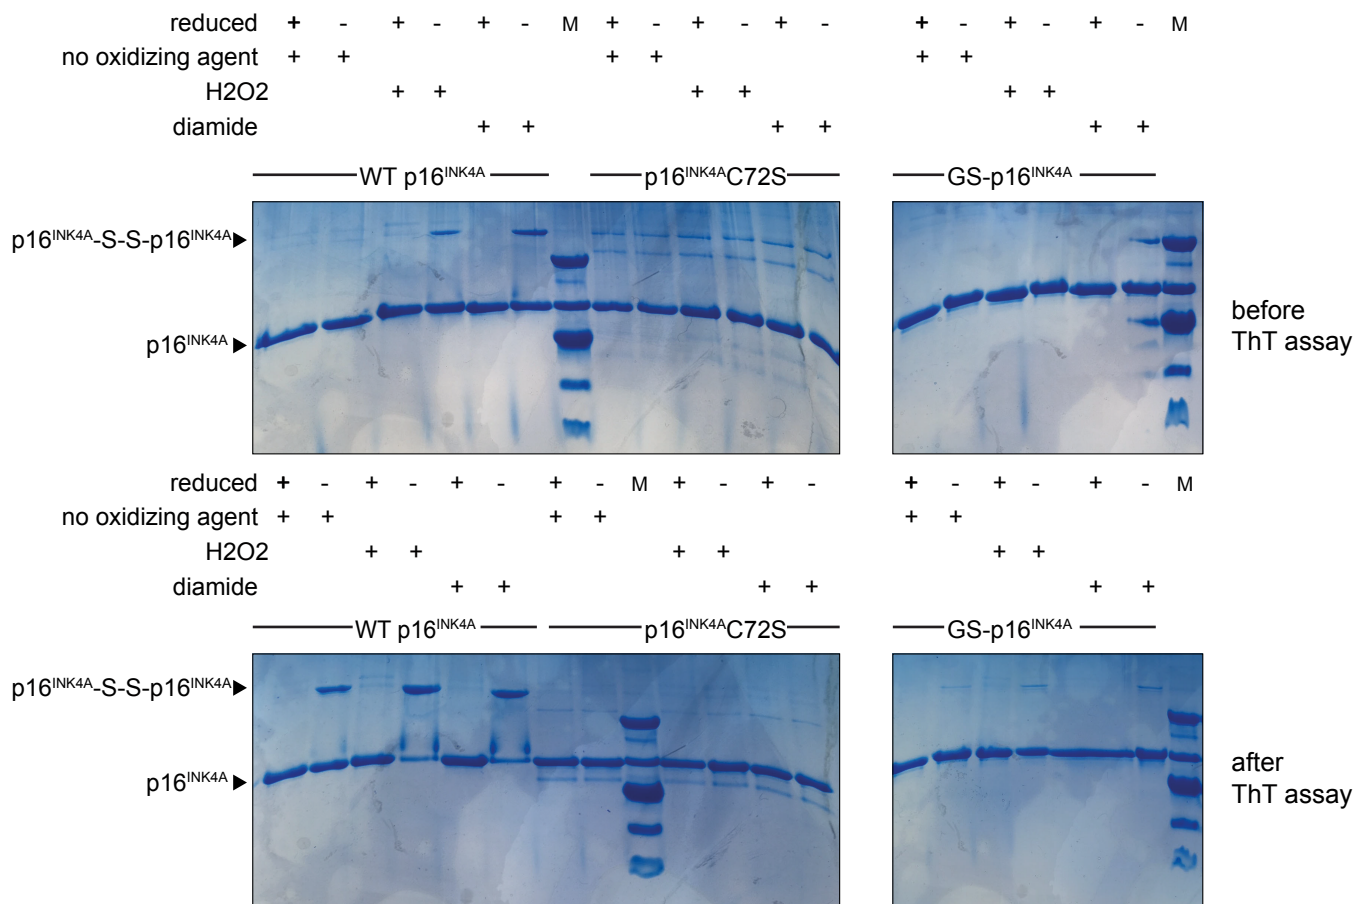

**Figure S10. SDS-PAGE of p16<sup>INK4A</sup> samples before and after ThT fibril formation assay.**

Samples were taken before and after the ThT kinetics assay (see Figure 4B) and analyzed by SDS-PAGE. WT p16<sup>INK4A</sup>, p16<sup>INK4A</sup>-C72S and GS-p16<sup>INK4A</sup> were allowed to form fibrils in the absence or presence of oxidizing agents (H<sub>2</sub>O<sub>2</sub> or diamide). Samples for gel analysis were incubated in SDS loading buffer with or without reducing agent (DTT). Dimer bands can be seen in non-reduced samples of oxidized WT p16<sup>INK4A</sup>. Similar experiments (with slightly different loading and conditions) were performed at least 4 times. A typical result is shown.
