# Supplementary material for: Cysteine oxidation triggers amyloid fibril formation of the tumor suppressor p16INK4A
Source: PubMed Central journal article supplement — Redox Biol. 2019 Sep 3;28:101316. doi: 10.1016/j.redox.2019.101316 (PMC6812003; doi:10.1016/j.redox.2019.101316), 2019-09-03
Supplement: mmc11.pdf [file mmc11.pdf]

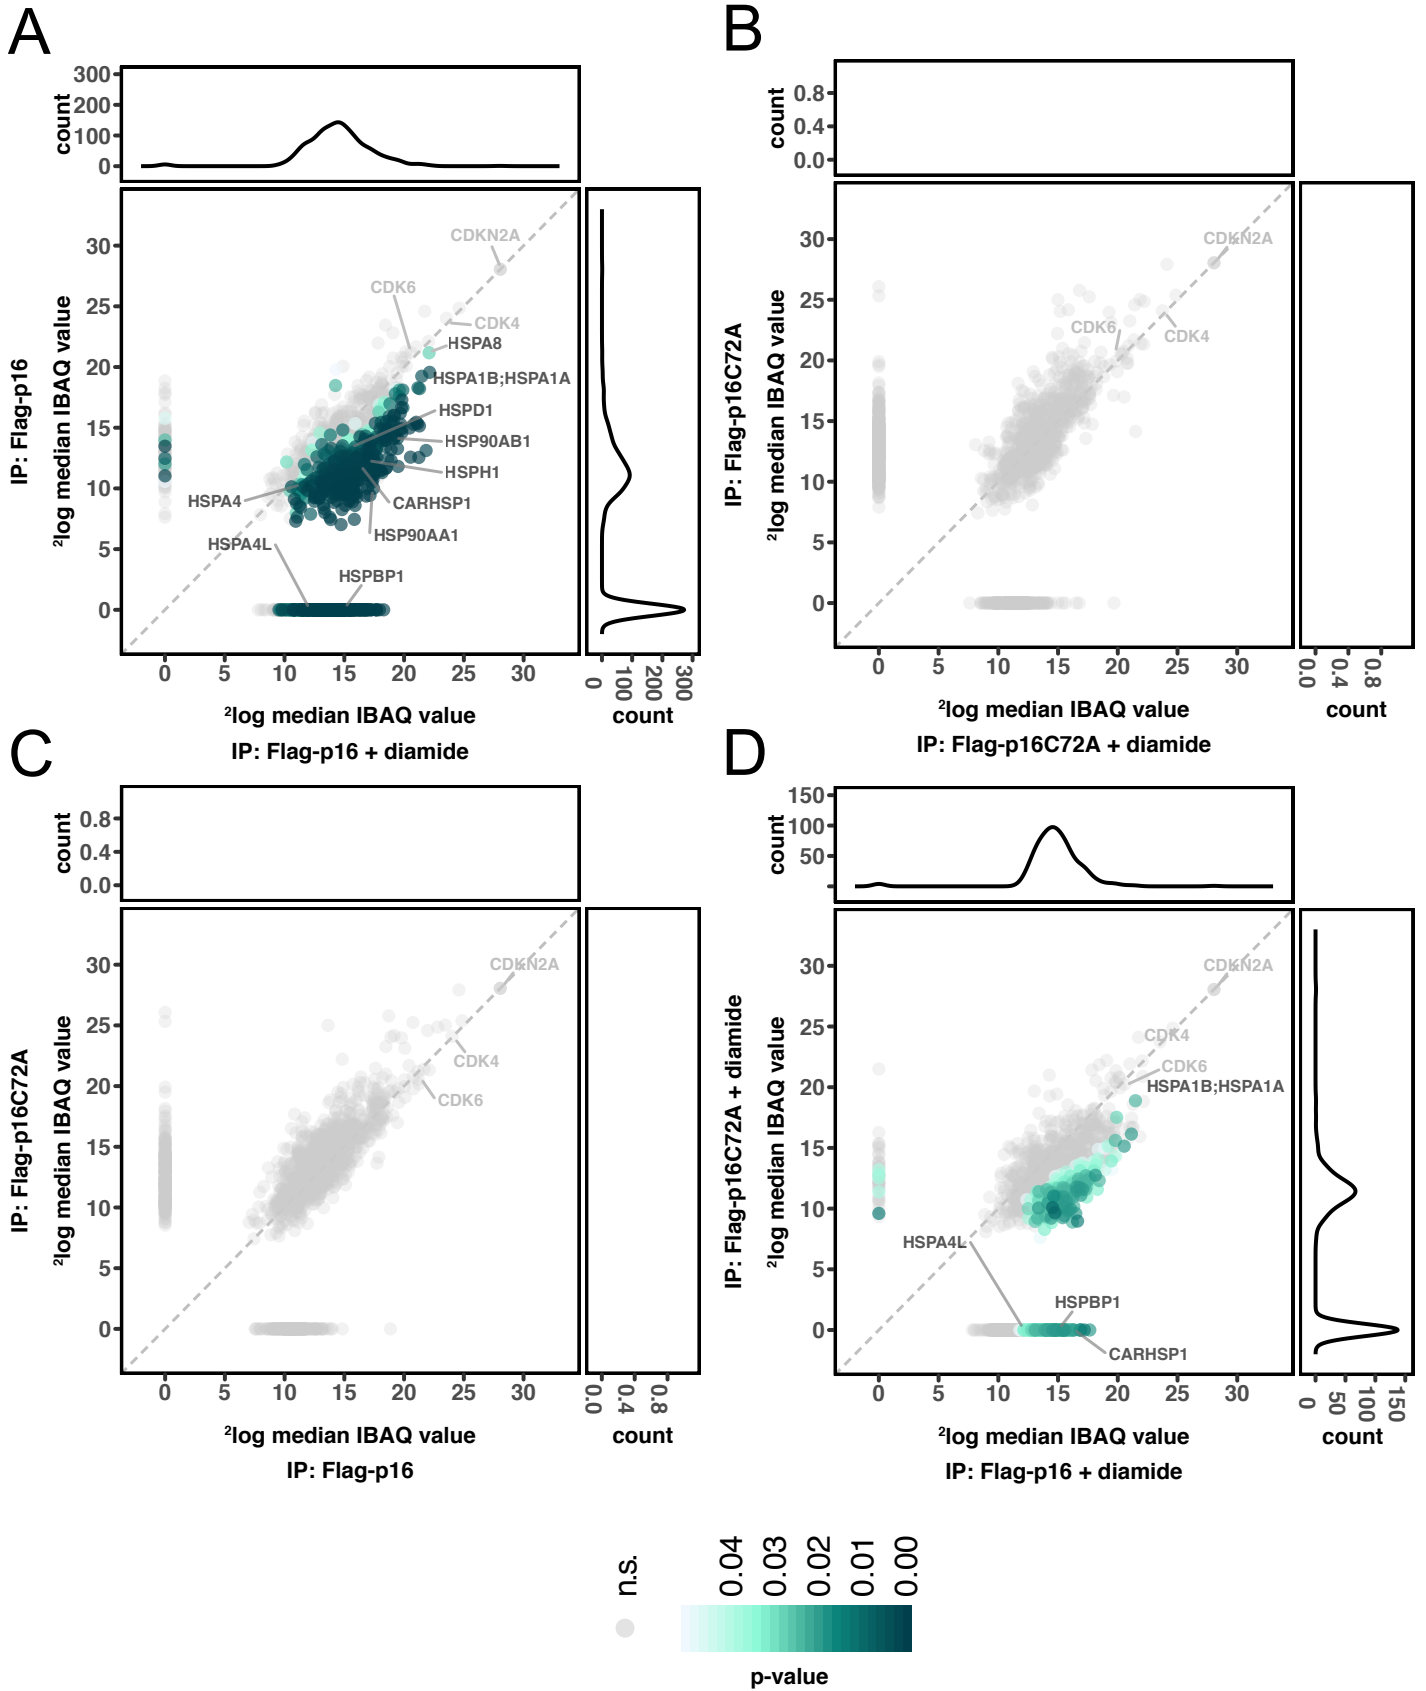

**Figure S11. MS/MS analysis of the p16<sup>INK4A</sup> interactome upon oxidation.**

Diamide treatment (200  $\mu$ M) induces large changes in the interaction profile of WT p16<sup>INK4A</sup> and this largely depends on C72.

**(A)** Comparison of the interactomes of WT p16<sup>INK4A</sup> with or without diamide treatment.

**(B)** Comparison of the interactomes of p16<sup>INK4A</sup>-C72A with or without diamide treatment.

**(C)** Comparison of the interactomes of WT p16<sup>INK4A</sup> and p16<sup>INK4A</sup>-C72A without diamide treatment.

**(D)** Comparison of the interactomes of WT p16<sup>INK4A</sup> and p16<sup>INK4A</sup>-C72A with diamide treatment. Note that the interaction with CDK4 and CDK6 is not altered by diamide treatment nor C72 dependent and that equal amounts of WT p16<sup>INK4A</sup> and p16<sup>INK4A</sup>-C72A were pulled down. Several chaperone proteins can be found to interact upon oxidation. Log-transformed median IBAQ values are plotted, green colors represent proteins with adjusted p-values smaller than 0.05. Marginal plots represent the total number of significant proteins. N=6 biological replicates for WT p16<sup>INK4A</sup> and p16<sup>INK4A</sup>-C72A, N=5 for p16<sup>INK4A</sup> + diamide and N=4 for p16<sup>INK4A</sup>-C72A + diamide.
